# Supplementary material for: Evolution of the novel coronavirus from the ongoing Wuhan outbreak and modeling of its spike protein for risk of human transmission
Source: Springer Nature journal article supplement (doi:10.1007/s11427-020-1637-5), 2020-01-21
Supplement: 11427_2020_1637_MOESM1_ESM.pdf [file 11427_2020_1637_MOESM1_ESM.pdf]

1 **Supporting Information:**

2

3

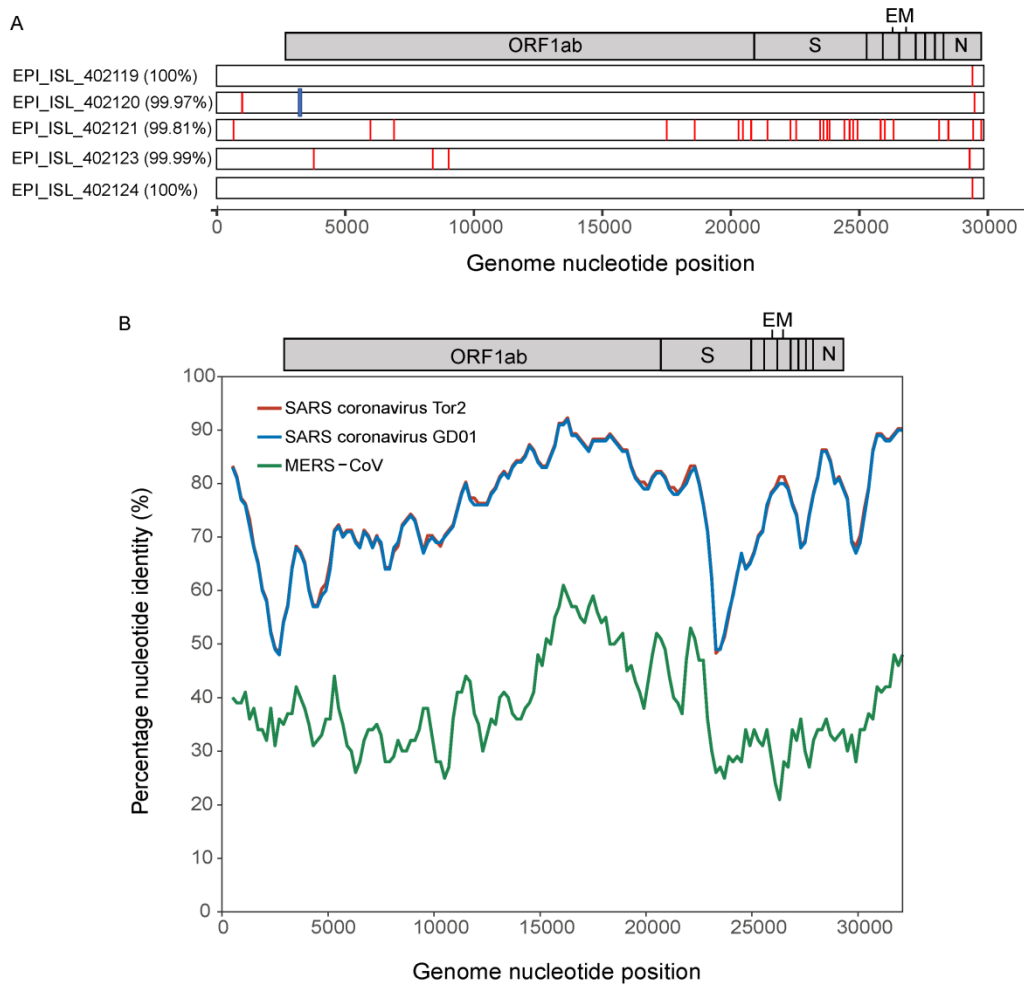

4

5 **Figure S1** Sequence similarity analysis among six Wuhan CoV genomes and between  
6 Wuhan CoV and the human-infecting coronaviruses, SARS-CoV and MERS-CoV. A)  
7 Sequence comparison of five Wuhan CoV genomes against WH-Human\_1 genome,  
8 respectively. Regions of open read frames (ORF) are represented with gray box on the  
9 top. Single nucleotide variations (SNVs) were identified by comparing to the  
10 WH-human\_1 genome using the NCBI Blast tool. SNVs are marked with red lines,  
11 and indels marked with blue bars. **The more frequent SNVs in the genome of**  
12 **Wuhan/IVDCHB05/2019\_EPI\_ISL\_402121 are likely the result of poor quality**  
13 **sequence data.** B) Similarity plot of the Wuhan CoV genome (WH-human\_1 used as  
14 representative) compared to those of SARS-CoV and MERS-CoV. The analysis was  
15 performed using the Kimura model with a window size of 1000 bp and a step size of  
16 200 bp.
