# Supplementary material for: Evolution of the novel coronavirus from the ongoing Wuhan outbreak and modeling of its spike protein for risk of human transmission
Source: Springer Nature journal article supplement (doi:10.1007/s11427-020-1637-5), 2020-01-21
Supplement: 11427_2020_1637_MOESM2_ESM.pdf [file 11427_2020_1637_MOESM2_ESM.pdf]

**Table S1** Acknowledgement to the authors, originating and submitting laboratories of the sequences from GISAID

We gratefully acknowledge the Authors, the Originating and Submitting Laboratories for sharing the five additional Wuhan CoV genome sequences sequence and metadata (Accession ID: EPI\_ISL\_402120, EPI\_ISL\_402119, EPI\_ISL\_402121, EPI\_ISL\_402124, EPI\_ISL\_402123) through GISAID [1], on which this research is based.

All submitters of data may be contacted directly via [www.gisaid.org](http://www.gisaid.org)

| Accession ID                   | Virus name                       | Location                            | Collection date | Originating lab                                                                                   | Submitting lab                                                                                    | Authors                                                                                                                                                                                                                                                                               |
|--------------------------------|----------------------------------|-------------------------------------|-----------------|---------------------------------------------------------------------------------------------------|---------------------------------------------------------------------------------------------------|---------------------------------------------------------------------------------------------------------------------------------------------------------------------------------------------------------------------------------------------------------------------------------------|
| <a href="#">EPI_ISL_402120</a> | BetaCoV/Wuhan/IVD C-HB-04/2020   | China / Hubei Province / Wuhan City | 2020/1/1        | National Institute for Viral Disease Control and Prevention, China CDC                            | National Institute for Viral Disease Control and Prevention, China CDC                            | Wenjie Tan, Xiang Zhao, Wenling Wang, Xuejun Ma, Yongzhong Jiang, Roujian Lu, Ji Wang, Weimin Zhou, Peihua Niu, Peipei Liu, Faxian Zhan, Weifeng Shi, Baoying Huang, Jun Liu, Li Zhao, Yao Meng, Xiaozhou He, Fei Ye, Na Zhu, Yang Li, Jing Chen, Wenbo Xu, George F. Gao, Guizhen Wu |
| <a href="#">EPI_ISL_402119</a> | BetaCoV/Wuhan/IVD C-HB-01/2019   | China / Hubei Province / Wuhan City | 2019/12/30      | National Institute for Viral Disease Control and Prevention, China CDC                            | National Institute for Viral Disease Control and Prevention, China CDC                            | Wenjie Tan, Xiang Zhao, Wenling Wang, Xuejun Ma, Yongzhong Jiang, Roujian Lu, Ji Wang, Weimin Zhou, Peihua Niu, Peipei Liu, Faxian Zhan, Weifeng Shi, Baoying Huang, Jun Liu, Li Zhao, Yao Meng, Xiaozhou He, Fei Ye, Na Zhu, Yang Li, Jing Chen, Wenbo Xu, George F. Gao, Guizhen Wu |
| <a href="#">EPI_ISL_402121</a> | BetaCoV/Wuhan/IVD C-HB-05/2019   | China / Hubei Province / Wuhan City | 2019/12/30      | National Institute for Viral Disease Control and Prevention, China CDC                            | National Institute for Viral Disease Control and Prevention, China CDC                            | Wenjie Tan, Xuejun Ma, Xiang Zhao, Wenling Wang, Yongzhong Jiang, Roujian Lu, Ji Wang, Peihua Niu, Weimin Zhou, Faxian Zhan, Weifeng Shi, Baoying Huang, Jun Liu, Li Zhao, Yao Meng, Fei Ye, Na Zhu, Xiaozhou He, Peipei Liu, Yang Li, Jing Chen, Wenbo Xu, George F. Gao, Guizhen Wu |
| <a href="#">EPI_ISL_402124</a> | BetaCoV/Wuhan/WIV04/2019         | China / Hubei Province /            | 2019/12/30      | Wuhan Jinyintan Hospital                                                                          | Wuhan Institute of Virology, Chinese Academy of Sciences                                          | Peng Zhou, Xing-Lou Yang, Ding-Yu Zhang, Lei Zhang, Yan Zhu, Hao-Rui Si, Zhengli Shi                                                                                                                                                                                                  |
| <a href="#">EPI_ISL_402123</a> | BetaCoV/Wuhan/IPBCAMS-WH-01/2019 | China / Hubei Province / Wuhan City | 2019/12/24      | Institute of Pathogen Biology, Chinese Academy of Medical Sciences & Peking Union Medical College | Institute of Pathogen Biology, Chinese Academy of Medical Sciences & Peking Union Medical College | Lili Ren, Jianwei Wang, Qi Jin, Zichun Xiang, Yongjun Li, Zhiqiang Wu, Chao Wu, Yiwei Liu                                                                                                                                                                                             |

[1] Shu, Y., McCauley, J. (2017) GISAID: Global initiative on sharing all influenza data – from vision to reality EuroSurveillance, 22(13) doi:10.2807/1560-7917.ES.2017.22.13.30494 PMID: PMC5388101
